# Supplementary material for: Hydrophilic co-assemblies of two hydrophobic biomolecules improving the bioavailability of silybin
Source: Royal Society of Chemistry journal article supplement (doi:10.1039/d0fo01882a), 2020-01-01
Supplement: d0fo01882a1.pdf [file d0fo01882a1.pdf]

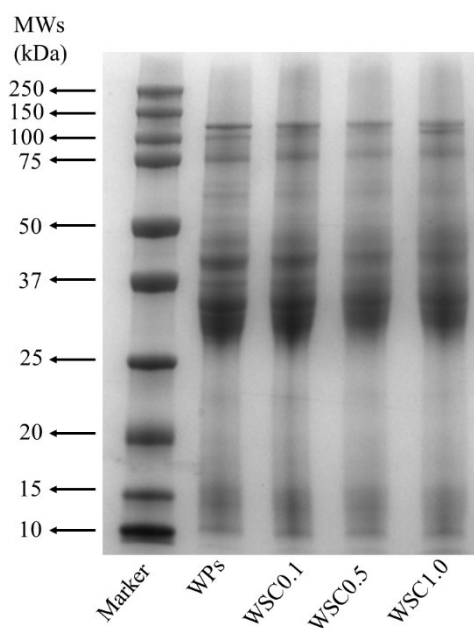

Fig. S1. SDS-PAGE profiles of WPs and silybin loaded WSCs.

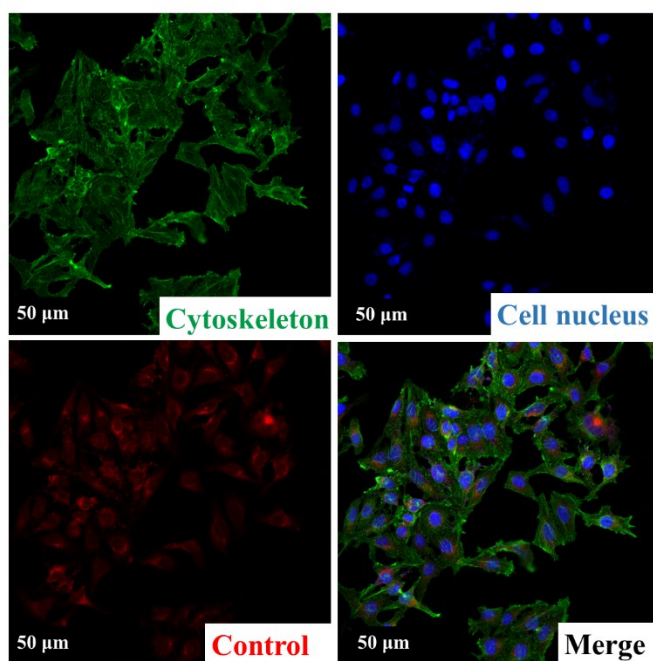

Fig. S2. CLSM images of HepG-2 cells cultured with non-silybin loaded WSC1.0.
